1 RESEARCH ARTICLE

2

3 **CX3CR1 Engagement by Respiratory Syncytial Virus Leads to Induction of Nucleolin and**  
4 **Dysregulation of Cilia-related Genes**

5

6 Christopher S. Anderson<sup>a\*</sup>, Tatiana Chirkova<sup>b\*</sup>, Christopher G. Slaunwhite, Xing Qiu<sup>c</sup>, Edward E. Walsh<sup>d</sup>,  
7 Larry J. Anderson<sup>b#</sup> and Thomas J. Mariani<sup>a#</sup>

8

9 <sup>a</sup>Departments of Pediatrics, University of Rochester Medical Center, Rochester, NY.

10 <sup>b</sup>Emory University Department of Pediatrics and Children's Healthcare of Atlanta, Atlanta, GA.

11 <sup>c</sup>Department of Biostatistics and Computational Biology

12 <sup>d</sup>Department of Medicine, University of Rochester Medical Center, Rochester, NY.

13 \* contributed equally to this work

14 #corresponding authors

15

16 Address for Correspondence:

17 Thomas J. Mariani, PhD

18 Professor of Pediatrics

19 Division of Neonatology and

20 Pediatric Molecular and Personalized Medicine Program

21 University of Rochester Medical Center

22 601 Elmwood Ave, Box 850

23 Rochester, NY 14642, USA.

24 Phone: 585-276-4616; Fax: 585-276-2643;

25 E-mail: Tom\_Mariani@urmc.rochester.edu

26

27 Larry J. Anderson, MD  
28 Professor and Marcus Chair of Infectious Diseases  
29 Department of Pediatrics  
30 Emory - Children's Center  
31 2015 Uppergate Drive, Room 530  
32 Atlanta, GA 30322  
33 Phone: 404-712-6604; Fax: 404-727-9223  
34 E-mail: [larry.anderson@emory.edu](mailto:larry.anderson@emory.edu)

35

36 This original work was supported by the NIH/NIAID HHSN272201200005C, the University of Rochester  
37 Pulmonary Training Fellowship NIH/NHLBI T32-HL066988, the University of Rochester HSCCI  
38 OP211341, the University of Rochester SAC Incubator Award, and the Department of Pediatrics, Emory  
39 University School of Medicine.

40

41 Running title: RSV CX3C Transcriptomics

42

43

44

45

46 **Abstract (250 words)**

47 Respiratory syncytial virus (RSV) contains a conserved CX3C motif on the ectodomain of the G-protein.  
48 The motif has been indicated as facilitating attachment of the virus to the host initiating infection via the  
49 human CX3CR1 receptor. The natural CX3CR1 ligand, CX3CL1, has been shown to induce signaling  
50 pathways resulting in transcriptional changes in the host cells. We hypothesize that binding of RSV to  
51 CX3CR1 via CX3C leads to transcriptional changes in host epithelial cells. Using transcriptomic analysis,  
52 the effect of CX3CR1 engagement by RSV was investigated. Normal human bronchial epithelial (NHBE)  
53 cells were infected with RSV virus containing either wildtype G-protein, or a mutant virus containing a  
54 CX4C mutation in the G-protein. RNA sequencing was performed on mock and 4-days-post-infected  
55 cultures. NHBE cultures were also treated with purified recombinant wild-type A2 G-protein. Here we  
56 report that RSV infection resulted in significant changes in the levels 766 transcripts. Many nuclear  
57 associated proteins were upregulated in the WT group, including Nucleolin. Alternatively, cilia-associated  
58 genes, including CC2D2A and CFAP221 (PCDP1), were downregulated. The addition of recombinant G-  
59 protein to the culture lead to the suppression of cilia-related genes while also inducing Nucleolin.  
60 Mutation of the CX3C motif (CX4C) reversed these effects on transcription decreasing nucleolin  
61 induction and lessening the suppression of cilia-related transcripts in culture. Furthermore,  
62 immunohistochemical staining demonstrated decreases in in ciliated cells and altered morphology.  
63 Therefore, it appears that engagement of CX3CR1 leads to induction of genes necessary for RSV entry as  
64 well as dysregulation of genes associated with cilia function.

65

66 **Importance (150 words)**

67 Respiratory Syncytial Virus (RSV) has an enormous impact on infants and the elderly including increased  
68 fatality rates and potential for causing lifelong lung problems. Humans become infected with RSV  
69 through the inhalation of viral particles exhaled from an infected individual. These virus particles contain  
70 specific proteins that the virus uses to attach to human ciliated lung epithelial cells, initiating infection.  
71 Two viral proteins, G-protein and F-protein, have been shown to bind to human CX3CR1 and Nucleolin,

72 respectively. Here we show that the G-protein induces Nucleolin and suppresses gene transcripts specific  
73 to ciliated cells. Furthermore, we show that mutation of the CX3C-motif on the G-protein, CX4C,  
74 reverses these transcriptional changes.

75

76 Keywords: RSV, CX3CR1, CX3CL1, Cilia, Interferon, Leukotrienes, Cytokines, Virus, Respiratory

77

78

## 79 **Introduction**

80           Respiratory Syncytial Virus causes respiratory disease in humans(1). Initial infections occur  
81 usually within the first year of life and continually throughout childhood and adulthood(2, 3), (4, 5). RSV  
82 infection initiates in the upper airways and can be found in the lower airways during severe disease(6).  
83 Symptoms are generally mild, manifesting in stages similar to the common cold (e.g. rhinorrhea, cough,  
84 sneezing, fever, wheezing) but can manifest as viral pneumonia during severe disease which occurs  
85 mostly in young children and elderly adults (7). The economic impact of RSV in the United States is  
86 estimated at over a half a billion dollars and the World Health Organization has listed RSV as a public  
87 health priority(8, 9).

88           RSV contains a negative-sense, single-stranded, genome. The RSV genome encodes 11 separate  
89 proteins using host translation machinery(1). Two proteins, G and F, facilitate attachment and viral  
90 penetration into the host cell(10). The RSV G-protein contains a CX3C motif that has been implicated as  
91 an attachment motif of RSV(11-15). The CX3C motif is similar to that found in fractalkine (CX3CL1)  
92 and has been shown to bind the host fractalkine receptor, CX3CR1, although perhaps in a manner unique  
93 from fractalkine(16). RSV F-protein has been implicated in both attachment and entry into the host  
94 epithelial cell. The attachment motif of F is still unknown, but attachment to the host protein via  
95 Nucleolin, has been well reported(17).

96           RSV primarily targets host epithelial cells in the lungs(18), although many cell types are  
97 infectible(19-21). Multiple host proteins have been indicated in RSV attachment including CX3CR1,  
98 Nucleolin, ICAM-1, Heparan sulfate, chondroitin sulfate(22). The physiological location of some these  
99 proteins on the apical lung epithelium has not been completely explored, although CX3CR1 have been  
100 shown to exist on apical surface of human lung tissue(12, 15). CX3CR1 has been shown as a co-receptor  
101 for other viruses, including HIV(23), and variations in the CX3CR1 allele has been shown to increase  
102 susceptibility to HIV-1 infection and progression to AIDS(24). Although the exact mechanism behind  
103 attachment and fusion of RSV to the host is still being investigated, host CX3CR1 appears to play a role  
104 in RSV infection.

105 CX3CR1 engagement by its ligand CX3CL1 (fractalkine) has been shown to regulate cellular  
106 transcription via its heterotrimeric G $\alpha$ i protein. Specifically, the binding of CX3CR1 by CX3CL1 has  
107 been shown to increase numerous signaling molecules including several different secondary messengers  
108 and transcription factors(25). If attachment of RSV to CX3CR1 results in host epithelial cell  
109 transcriptional changes is unknown. Here we use primary human differentiated epithelial cell cultures to  
110 evaluate the effect of CX3CR1 engagement by RSV.

111

## 112 **Methods**

113 **Virus Propagation.** Four RSV strains were used for the NHBE infection: A2, A2CX4C mutant with the  
114 an alanine A<sup>186</sup> insertion in the CX3C motif (<sup>182</sup>CWAIAC<sup>187</sup>) of G protein, recombinant rA2 line 19F  
115 (r19F), and r19FCX4C mutant (provided by Dr. M.L. Moore, formerly at Emory University and presently  
116 with Meissa Vaccines, Inc., South San Francisco, CA). The prototype A2 strain of RSV (ATCC,  
117 Manassas VA) was propagated in HEp-2 cells after serial plaque purification to reduce defective-  
118 interfering particles. A stock virus designated as RSV/A2 Lot# 092215 SSM containing approximately  
119  $5.0 \times 10^8$  PFU/mL in sucrose-stabilizing media and stored at  $-80$  °C for inoculation. This stock of virus  
120 has been characterized and validated for upper and lower respiratory tract replication in the cotton rat  
121 model. The A2CX4C, r19F and r19FCX4C viruses were grown in HEp-2 cells at 0.1 or 0.01 multiplicity  
122 of infection (MOI) to reduce defective-interfering particles, purified through a sucrose cushion, and stored  
123 at  $-80$  °C. For inoculation, the virus was thawed, diluted to a final concentration with PBS (pH 7.4 w/o  
124 Ca<sup>2+</sup> or Mg<sup>2+</sup>), kept on ice, and used within an hour.

125

126 **NHBE Cells.** Normal human bronchial epithelial cells healthy adult patients were kindly provided by Dr.  
127 C.U. Cotton (Case Western Reserve University), expanded, and cultured as described (26). Briefly, cells  
128 were plated on a layer of mitomycin C (Sigma) treated 3T3 mouse fibroblast feeder cells and grown until  
129 70% confluency in the 3:1 mixture of Ham's F12/DMEM media (HyClone) supplemented with 5% FBS  
130 (Sigma), 24  $\mu$ g/mL adenine (Sigma), 0.4  $\mu$ g/mL hydrocortisone (Sigma), 5  $\mu$ g/mL Insulin (Sigma), 10

131 ng/mL EGF (Sigma), 8.4 ng/mL Cholera toxin, and 10  $\mu$ M ROCK1 inhibitor Y-2763 (Selleck Chemical  
132 LLC). After expansion, cells (passage 3 or 4) were plated on Costar Transwell inserts (Corning Inc.,  
133 Corning, NY), grown until confluency, then transferred to air-liquid interface where cells were  
134 maintained in 1:1 mixture of Ham's F12/DMEM media supplemented with 2% Ultrosor G (Pall Biosepra,  
135 SA, Cergy-Sainte-Christophe, France) for 4 weeks until they were differentiated. Differentiation was  
136 confirmed by transepithelial resistance measurements  $>500$  ohms, and flow cytometry staining for FoxJ1  
137 (eBioscience) and acetylated  $\alpha$ -tubulin (Life Technologies).

138  
139 **NHBE Inoculation.** The differentiated NHBE cultures were inoculated with RSV MOI of 0.1 or 0.3 as  
140 determined by infectivity titration in HEP-2 cells. The NHBE were washed with PBS and virus in PBS or  
141 PBS alone was added to the apical surface of the cells and incubated for 1 h at 37 °C, the virus inoculum  
142 aspirated, the apical surface washed with PBS and fresh media added to the basolateral compartment. The  
143 RSV-infected NHBE were incubated for 4 days at 37 °C and 5% CO<sub>2</sub>, and then cell lysates were collected  
144 by washing cells twice with PBS and adding 100ul of RNA lysis buffer (Qiagen) to each well.

145  
146 **RNA Isolation.** RNA was extracted, DNase treated, and purified using a Qiagen RNeasy kit (QIAGEN).  
147 The RNA was reverse transcribed into cDNA using an iScript cDNA synthesis kit (Bio-Rad) following  
148 the manufacturer's instruction.

149  
150 **Real-Time PCR.** Semi-quantitative PCR was carried out on a 7500 Fast Real-time PCR system (Applied  
151 Biosystems) using Power SYBR Green PCR master mix (Applied Biosystems). The CT values were  
152 normalized using control PPIA CT values from the same samples. Top genes were validated using qPCR  
153 performed on samples from a separate experiment. Primer sequences: NCL Primer FWD  
154 GAACCGACTACGGCTTTCAAT, NCL Primer REV AGCAAAAACATCGCTGATACCA; CFAP221  
155 Primer FWD GGGTTGTTTCGCAATCAAGAAGA, CFAP221 Primer REV

156 GTTGAAACCGTTTTTGTGCC; CC2D2A Primer FWD CAAGCAGCGAGGTCCAAAG, CC2D2A  
157 Primer REV GGCTCTGTGCCAAATTCAGTC.

158

159 **RNA Sequencing.** Purified RNA was sequenced using the HiSeq 2500. Gene with low reads counts were  
160 filtered as previously described(27). Filtered reads were aligned to the GRCh38 reference genome. The  
161 RSV A2 virus genome (GenBank: KT992094.1) was used for virus transcript alignment. Gene counts  
162 were normalized and log transformed (R 3.4.4, rLog package). Multiple comparisons were corrected  
163 using the Benjamini-Hochberg method (R 3.4.4, “p.adjust()” command).

164

### 165 **Statistical Models**

166 Significant association between transcript levels and condition, both marginal association (mock infection  
167 vs RSV infection) and viral-transcript-level adjusted models (wildtype and CX4C mutant), was  
168 determined by linear regression (R 3.4.4. *lm* function). The wildtype and CX4C mutant comparisons were  
169 adjusted in the statistical model by using the eigenvalue for each sample derived using principal  
170 component analysis (FractalMineR) of 11 RSV gene transcript levels. Resulting p-values were adjusted  
171 for multiple testing using Benjamini-Hochberg method (R 3.4.4. *p.adjust* function). P values less than  
172 0.05 was considered significant.

173

### 174 **Pathway Analysis**

175 Gene symbols with unadjusted p-values of less than 0.05 was used for pathway analysis. Pathway  
176 analysis of gene sets were performed using ToppGene functional analysis software(28) and genes were  
177 referenced against the Gene Ontology (GO) Biological Process GO Term.

178



## 179 **Results**

### 180 **Transcriptional Changes after RSV Infection**

181           The transcriptional profile of normal human bronchial epithelial cells after infection with RSV  
182 was determined. Infection by RSV both increased and decreased gene transcripts relative to mock  
183 infected (Table 1, Supplemental Document 1). RSV infection significantly increased 558 gene transcripts.  
184 Infection resulted in the induction of transcripts encoding antiviral enzymes (OAS1, OAS2, CMPK2,  
185 HERC5, HERC6), antiviral peptides (RSAD2), interferon response genes (RIG-I, STAT1, STAT2, MX1,  
186 IFIT1, IFIT2, IFI44L, IRF1, OASL), mucin genes (MUC5AC, MUC5B, MUC15, MUC21, MUC13), and  
187 stat inhibitor genes (SOCS1, SOCS53), chemokines/cytokines (CX3CL1, CCL5, CXCL9, CXCL8,  
188 CXCL10, TGFA), interleukins and their receptors (IL1A, IL15, IL15R IL22RA1, IL2RG, IL18R1),  
189 Major Histocompatibility Complex genes (HLA-A, HLA-B, HLA-C, HLA-E, HLA-F, HLA-DMA, HLA-  
190 DRB1), Type-II helper T cell associated genes (PSENEN), toll-like receptors (TLR2), and innate immune  
191 cell differentiation/survival genes (BATF2, JAGN1). Both pro-apoptotic (CASP1, CASP4, CASP7,  
192 CASP8) and anti-apoptotic (Birc3, BCL2L13, BCL2L14, BCL2L15) transcripts were increased during  
193 infection. The 2'-O-ribose cap methyltransferase (CMTR1), a protein required for viral RNA cap  
194 snatching and shown to decrease interferon type I, was also increased after infection. Taken together,  
195 these results demonstrate many genes were upregulated in bronchial epithelial cells in response to RSV.

196           Pathway analysis of significantly upregulated genes (Mock vs RSV) demonstrated 1033  
197 significantly enriched biological processes (Figure 1A, Supplemental Document 2). The most  
198 significantly enriched biological processes included defense processes, responses to foreign objects,  
199 innate immune responses, and cytokine-associated responses. Innate immune responses were also found  
200 to be enriched. Taken together, we found that cellular defense and immune system biological processes  
201 were associated with increased viral transcript after RSV infection.

202           RSV infection also resulted in the reduction of 208 transcripts relative to mock infection with  
203 many transcripts associated with cell morphology (Table 1, Supplemental Document 1). This included  
204 microtubule-associated protein transcript levels (MAP6, MAPT, MAST1) and myosin transcript levels

205 (MYO6, MYO9A, MYO3A, MYO5A) were decreased after infection. We found many cilia associated  
206 genes (CC2D2A, PCDP1), lysosomal genes (LAMP1), leukotriene B4 hydrolase (LTA4H), WNT  
207 signaling transcripts (MCC, WNT2B), and RNA helicases (DHX40) to also be decreased during  
208 infection. Interestingly, the heparan sulfate sulfotransferase (HS3ST4) was among one of the most  
209 significantly associated down-regulated transcripts.

210 Pathway analysis of differentially expressed down-regulated genes identified 110 enriched  
211 biological processes (Figure 1B, Supplemental Document 3). Down-regulated genes were associated with  
212 biological process related to cellular morphology, including cell projection. Microtubule and cellular  
213 transplant related biological processes were also enriched for down-regulated genes including  
214 microtubule bundle formation, cytoskeletal transport, and protein localization.

215

### 216 **CX3C Specific Transcriptional Changes**

217 Infection with an A2 RSV virus containing a mutation in the CX3C motif (CX4C) resulted in a  
218 number of significant transcriptional changes relative to the wildtype virus (Table 2, Supplemental  
219 document 2). Five host transcripts were significantly decreased after mutant virus infection compared to  
220 wild-type virus infections. NCL (Nucleolin), the eukaryotic nucleolar phosphoprotein, was the most  
221 significantly decreased gene in the mutant virus infection compared to wildtype. The adenylate kinase,  
222 AK2, an apoptotic activator; the Golgi homeostasis protein, TMEM199, recently identified to be essential  
223 in influenza A virus infection; and the transcriptional coactivator (SNW1) which can bind the vitamin D  
224 receptor binding domain and retinoid receptors to enhance many gene expression pathways were also  
225 decreased after infection with the mutated compared to the wildtype virus.

226 There were 354 biological processes enriched for gene transcripts that were decreased in the  
227 mutant CX4C virus compared to mock infection (Figure 2A, Supplemental Document 5). Biological  
228 processes enriched for decreased genes included response to cytokines, response to type I interferon, and  
229 RNA processing. Innate immune response biological processes including Nucleolin and many virus-

230 signaling genes (e.g. BCL6, BATF and IRF2) were also decreased after mutant compared to wildtype  
231 infection.

232 After multiple comparison correction, two gene transcripts were significantly increased after  
233 mutant CX4C RSV infection compared to wildtype virus (Table 2, Supplemental Document 4). The most  
234 significantly associated transcript, C2orf81, has no known function and the other transcript, CC2D2A,  
235 encodes a protein that forms a complex localized at the transition zone of primary cilia.

236 The 1067 transcripts increased (uncorrected p-value < 0.05) after mutant virus infection relative  
237 to wildtype infection resulted in 78 biological pathways that were significantly enriched (Figure 2B,  
238 Supplemental Doc 6). The biological processes were all associated with cilia and microtubule function  
239 and formation. These included transport, organization, and assembly. The genes associated with these  
240 pathways included many cilia-related genes (CC2D2A, CFAP221, CFAP43, CFAP52). Dynein-related  
241 genes (DNAH3, DNAH6, DNAH9, DNAH10, DNAH12) were also associated with enriched pathways.  
242 Taken together, mutating the CX3C domain resulted in a significant increase in cilia-related genes and  
243 biological processes.

244

### 245 **Transcriptional Changes with CX3CR1 Ligand**

246 Recombinant G-protein soluble ligand representing the wildtype virus resulted in significant  
247 changes in transcript levels (Figure 3). Cilia-related genes (CC2D2A, CFAP221) were both significantly  
248 decreased after addition of G-protein ligand compared to mock treated cultures. Alternatively, Nucleolin  
249 was increased after treatment with G-protein ligand, although the relative fold-change was minor. Taken  
250 together, soluble G-protein effected transcript levels similarly to the differences seen between wildtype  
251 and CX4C mutant infections.

252

### 253 **Ciliated Cells after RSV Infection**

254 Immunohistochemistry of mock or RSV infected cells was performed in order to further  
255 understand the effect of RSV infection on ciliated cells (Figure 4A). Ciliated cells were found in both

256 infected and non-infected cultures. Epithelial cells infected with wildtype RSV showed a significant  
257 decrease in the number of ciliated cells compared to mock infection (Figure 4B). Taken together, both  
258 mock and infected cells contained ciliated cells, but RSV infection decreased the percentage of ciliated  
259 cells relative to mock infection.

260

## 261 **Discussion**

262 Respiratory epithelial cells act as both the primary target for RSV and the primary defense against  
263 the virus. Therefore, it is unsurprising that so many genes and biological processes were altered during  
264 RSV infection. For successful replication the virus must first attach to the epithelium, enter the cell,  
265 dispense genetic material, take over host translation machinery, and use host nutrients create new  
266 genomes and protein, assemble, and release from the cell(1). During this process, the host epithelium  
267 recognizes the foreign object, produces anti-viral peptides, and signals to neighboring cells (including  
268 immune cells) of the infection(29). Therefore, the virus must both avoid host responses and hijack cellular  
269 processes in order to successfully reproduce.

270 Here we demonstrate that these underlying biological processes occurring during virus infection  
271 of adult primary epithelial cells grown at a physiological air-liquid interface. Given our experimental  
272 design, it is impossible to distinguish the transcriptional effects due to the host reaction to the virus and  
273 those caused directly by the virus. Both viral proteins and viral genetic material can interfere with  
274 biological processes by directly acting on host cellular machinery resulting in cellular signaling cascades  
275 that lead to changes in transcriptional regulation. It is of no surprise that these changes have to do with  
276 mechanistic ciliary function that removes foreign objects from the respiratory tract and the induction of  
277 Nucleolin, an RSV F-protein receptor(17), which would presumably provide a fitness advantage for the  
278 virus.

279 These introductory studies demonstrate a unique relationship between two host genes, CX3CR1  
280 and Nucleolin, and two virus genes, G-protein and F-protein. These studies suggest that CX3CR1  
281 engagement by the RSV G-protein CX3C motif results in intercellular signaling impacting Nucleolin

282 expression. Although our experimental design did not allow us to discern any specifics in the signaling  
283 cascade, manipulating the cytokine pathway in order to provoke Nucleolin production would likely prove  
284 advantageous for the virus. Furthermore, these findings are consistent with the other viruses that  
285 manipulate host transcription in order to increase host proteins necessary to the virus(30).

286 Disruption of ciliary function has been described for many pathogens, although no morphology  
287 changes were seen after 24hrs post infection(31). A primary function of host immunity is the physical  
288 removal of foreign objects, including dead/infected cells, during an infection. It is important to note that  
289 the decrease in ciliated cells may be due to instability of the cilia and may have been disrupted during  
290 processing of the cultures. Regardless, it is clear that cilia, or the cells that express cilia, are affected by  
291 RSV infection. Given the role of cilia in the removal of foreign bodies, future studies will be needed to  
292 further characterize cilia function after RSV infection.

293 The CX4C mutant virus does not replicate at the level of the wildtype virus. Therefore, our  
294 statistical analysis required correction for variable levels of viral transcript. Although mathematical  
295 correction for viral transcripts levels using linear modeling have been continually shown to be accurate  
296 for these types of studies, it is not possible to completely distinguish Nucleolin induction or cilia  
297 dysregulation between wildtype and mutant based on CX3CR1 engagement from virus replication  
298 differences.

299 Furthermore, what effect disruption of the CX3CL1/CX3CR1 axis is having is unknown. It is  
300 entirely possible that the effect we see here is due to interference with autocrine signaling of CX3CL1  
301 on CX3CR1. Crystal structures(32) suggest that engagement of CX3CR1 by RSV G-protein may be  
302 fundamentally different than fractalkine. Our studies cannot distinguish blocking of CX3CL1 binding  
303 from receptor activation. Moreover, our results do not rule out a general immune response to viral  
304 proteins. Future studies will be needed to establish the mechanism by which the G protein binding to  
305 CX3CR1 increases Nucleolin and decreases cilia-related transcripts.

306 It is important to note that these studies involved only a single strain of the A-subtype (A2).  
307 Given the large differences between subtype A and subtype B G-protein genes, and the fact that G protein

308 has undergone significant genetic changes since the isolation of A2, future studies will need to determine  
309 if these transcriptional changes are consistent with RSV strains that have circulated recently and subtypes.

310 Taken together, RSV infection changes host gene expression and CX3CR1 appears to play a role  
311 in facilitating these changes. Our results suggest that RSV disrupts defense mechanisms while also  
312 increasing the expression of pro-viral proteins.

313

### 314 **Acknowledgements**

315 We like to thank Jason Myers for his help in RNA sequences and data processing. We would also like to  
316 thank Dr. M.L. Moore for providing the viruses used in this study.

317

### 318 **References**

- 319 1. **Fields BN.** 2013. *Fields Virology*. Stanford University Press.
- 320 2. **Piedimonte G, Perez MK.** 2014. Respiratory syncytial virus infection and bronchiolitis.  
321 *Pediatr Rev* **35**:519–530.
- 322 3. **Shi T, McAllister DA, O'Brien KL,** 2015. Global, regional, and national disease burden  
323 estimates of acute lower respiratory infections due to respiratory syncytial virus in young  
324 children in *Lancet*.
- 325 4. **Ali A, Lopardo G, Scarpellini B, Stein RT, Ribeiro D.** 2020. Systematic review on  
326 respiratory syncytial virus epidemiology in adults and the elderly in Latin America. *Int J Infect*  
327 *Dis* **90**:170–180.
- 328 5. **Han LL, Alexander JP, Anderson LJ.** 1999. Respiratory syncytial virus pneumonia among  
329 the elderly: an assessment of disease burden. *Journal of Infectious Diseases* **179**:25–30.
- 330 6. **Falsey AR, Hennessey PA, Formica MA, Cox C, Walsh EE.** 2005. Respiratory syncytial  
331 virus infection in elderly and high-risk adults. *N Engl J Med* **352**:1749–1759.
- 332 7. **Bennett JE, Dolin R, Blaser MJ.** 2015. *Mandell, Douglas, and Bennetts. Principles and*  
333 *Practice of Infectious Diseases*, Philadelphia: Churchill Livingstone.
- 334 8. **Paramore LC, Ciuryla V, Ciesla G, Liu L.** 2004. Economic impact of respiratory syncytial  
335 virus-related illness in the US - An analysis of national databases. *Pharmacoeconomics*  
336 **22**:275–284.
- 337 9. **Societies FOIR.** 2017. *The Global Impact of Respiratory Disease*.

- 338 10. **Meng J, Hotard AL, Currier MG, Lee S, Stobart CC, Moore ML.** 2016. Respiratory  
339 Syncytial Virus Attachment Glycoprotein Contribution to Infection Depends on the Specific  
340 Fusion Protein. *J Virol* **90**:245–253.
- 341 11. **Tripp RA, Jones LP, Haynes LM, Zheng HQ, Murphy PM, Anderson LJ.** 2001. CX3C  
342 chemokine mimicry by respiratory syncytial virus G glycoprotein. *Nat Immunol* **2**:732–738.
- 343 12. **Jeong K-I, Piepenhagen PA, Kishko M, DiNapoli JM, Groppo RP, Zhang L, Almond J,  
344 Kleanthous H, Delagrave S, Parrington M.** 2015. CX3CR1 Is Expressed in Differentiated  
345 Human Ciliated Airway Cells and Co-Localizes with Respiratory Syncytial Virus on Cilia in a  
346 G Protein-Dependent Manner. *PLoS ONE* **10**:e0130517.
- 347 13. **Chirkova T, Lin S,** 2015. CX3CR1 is an important surface molecule for respiratory syncytial  
348 virus infection in human airway epithelial cells. *Journal of General Virology*.
- 349 14. **Johnson SM, McNally BA, Ioannidis I,** 2015. Respiratory syncytial virus uses CX3CR1 as a  
350 receptor on primary human airway epithelial cultures. *PLoS Pathogens*
- 351 15. **Anderson CS, Chu C-Y, Wang Q, Mereness JA, Ren Y, Donlon K, Bhattacharya S,  
352 Misra RS, Walsh EE, Pryhuber GS, Mariani TJ.** 2020. CX3CR1 as a respiratory syncytial  
353 virus receptor in pediatric human lung. *Pediatr Res* **87**:862–867.
- 354 16. **Jones HG, Ritschel T, Pascual G, Brakenhoff JPI, Keogh E, Furmanova-Hollenstein P,  
355 Lanckacker E, Wadia JS, Gilman MSA, Williamson RA, Roymans D, van t Wout AB,  
356 Langedijk JP, McLellan JS.** 2018. Structural basis for recognition of the central conserved  
357 region of RSV G by neutralizing human antibodies. *PLoS Pathog* **14**:e1006935.
- 358 17. **Tayyari F, Marchant D, Moraes TJ, Duan W, Mastrangelo P, Hegele RG.** 2011.  
359 Identification of nucleolin as a cellular receptor for human respiratory syncytial virus. *Nat Med*  
360 **17**:1132–1135.
- 361 18. **Zhang L, Peeples ME, Boucher RC, Collins PL, Pickles RJ.** 2002. Respiratory syncytial  
362 virus infection of human airway epithelial cells is polarized, specific to ciliated cells, and  
363 without obvious cytopathology. *J Virol* **76**:5654–5666.
- 364 19. **Raiden S, Sananez I, Remes-Lenicov F, Pandolfi J, Romero C, De Lillo L, Ceballos A,  
365 Geffner J, Arruvito L.** 2017. Respiratory Syncytial Virus (RSV) Infects CD4+ T Cells:  
366 Frequency of Circulating CD4+ RSV+ T Cells as a Marker of Disease Severity in Young  
367 Children. *J Infect Dis* **215**:1049–1058.
- 368 20. **Zhivaki D, Lemoine S, Lim A, Morva A, Vidalain P-O, Schandene L, Casartelli N,  
369 Rameix-Welti M-A, Hervé P-L, Dériaud E, Beitz B, Ripaux-Lefevre M, Miatello J,  
370 Lemercier B, Lorin V, Descamps D, Fix J, Eléouët J-F, Riffault S, Schwartz O,  
371 Porcheray F, Mascart F, Mouquet H, Zhang X, Tissières P, Lo-Man R.** 2017. Respiratory  
372 Syncytial Virus Infects Regulatory B Cells in Human Neonates via Chemokine Receptor  
373 CX3CR1 and Promotes Lung Disease Severity. *Immunity* **46**:301–314.
- 374 21. **Cirino NM, Panuska JR, Villani A, Taraf H, Rebert NA, Merolla R, Tsivitse P, Gilbert  
375 IA.** 1993. Restricted replication of respiratory syncytial virus in human alveolar macrophages.  
376 *Journal of General Virology* **74 ( Pt 8)**:1527–1537.

- 377 22. **Griffiths C, Drews SJ, Marchant DJ.** 2017. Respiratory Syncytial Virus: Infection,  
378 Detection, and New Options for Prevention and Treatment. *Clin Microbiol Rev* **30**:277–319.
- 379 23. **Combadiere C, Salzwedel K, Smith ED, Tiffany HL, Berger EA, Murphy PM.** 1998.  
380 Identification of CX3CR1. A chemotactic receptor for the human CX3C chemokine fractalkine  
381 and a fusion coreceptor for HIV-1. *J Biol Chem* **273**:23799–23804.
- 382 24. **Faure S, Meyer L, Costagliola D, Vaneensberghe C, Genin E, Autran B, Delfraissy JF,**  
383 **McDermott DH, Murphy PM, Debré P, Théodorou I, Combadiere C.** 2000. Rapid  
384 progression to AIDS in HIV+ individuals with a structural variant of the chemokine receptor  
385 CX3CR1. *Science* **287**:2274–2277.
- 386 25. **Poniatowski ŁA, Wojdasiewicz P, Krawczyk M, Szukiewicz D, Gasik R, Kubaszewski Ł,**  
387 **Kurkowska-Jastrzębska I.** 2017. Analysis of the Role of CX3CL1 (Fractalkine) and Its  
388 Receptor CX3CR1 in Traumatic Brain and Spinal Cord Injury: Insight into Recent Advances  
389 in Actions of Neurochemokine Agents. *Mol Neurobiol* **54**:2167–2188.
- 390 26. **Ha B, Chirkova T, Boukhvalova MS, Sun HY, Walsh EE, Anderson CS, Mariani TJ,**  
391 **Anderson LJ.** 2019. Mutation of Respiratory Syncytial Virus G Protein's CX3C Motif  
392 Attenuates Infection in Cotton Rats and Primary Human Airway Epithelial Cells. *Vaccines*  
393 (Basel) **7**.
- 394 27. **Chu C-Y, Qiu X, Wang L, Bhattacharya S, Lofthus G, Corbett A, Holden-Wiltse J, Grier**  
395 **A, Tesini B, Gill SR, Falsey AR, Caserta MT, Walsh EE, Mariani TJ.** 2016. The Healthy  
396 Infant Nasal Transcriptome: A Benchmark Study. *Sci Rep* **6**:33994.
- 397 28. **Chen J, Bardes EE, Aronow BJ, Jegga AG.** 2009. ToppGene Suite for gene list enrichment  
398 analysis and candidate gene prioritization. *Nucleic Acids Res* **37**:W305–11.
- 399 29. **Janeway C.** 1996. *Immunobiology*. Taylor & Francis Group.
- 400 30. **Seitz C, Frensing T, Hoper D, Kochs G, Reichl U.** 2010. High yields of influenza A virus in  
401 Madin-Darby canine kidney cells are promoted by an insufficient interferon-induced antiviral  
402 state. *Journal of General Virology* **91**:1754–1763.
- 403 31. **Jumat MR, Yan Y, Ravi LI, Wong P, Huong TN, Li C, Tan BH, Wang DY, Sugrue RJ.**  
404 2015. Morphogenesis of respiratory syncytial virus in human primary nasal ciliated epithelial  
405 cells occurs at surface membrane microdomains that are distinct from cilia. *Virology* **484**:395–  
406 411.
- 407 32. **McLellan JS, Ray WC, Peeples ME.** 2013. Structure and function of respiratory syncytial  
408 virus surface glycoproteins. *Curr Top Microbiol Immunol* **372**:83–104.
- 409
- 410
- 411
- 412



413

414

415 **Table 1. Mock vs Wildtype RSV Infection Differentially Expressed Genes**

| Relative to Mock | Gene Symbol  | Gene Description                                                           | NCBI_GeneID | <i>B</i>     | <i>P</i> value |
|------------------|--------------|----------------------------------------------------------------------------|-------------|--------------|----------------|
| Up               | BATF2        | Basic Leucine Zipper ATF-Like Transcription Factor 2                       | 116071      | -2.219807223 | 0.00000841     |
| Up               | STAT1        | Signal transducer and activator of transcription 1                         | 6772        | -1.932894088 | 0.00000841     |
| Up               | MX1          | MX dynamin like GTPase 1                                                   | 4599        | -3.026455262 | 0.00000841     |
| Up               | TRIM14       | Tripartite motif containing 14                                             | 9830        | -1.373708618 | 0.00000887     |
| Up               | MX2          | MX dynamin like GTPase 2                                                   | 4600        | -3.352521625 | 0.00000887     |
| Up               | OASL         | 2'-5'-oligoadenylate synthetase like                                       | 8638        | -3.527345499 | 0.00000887     |
| Up               | HSH2D        | Hematopoietic SH2 domain containing                                        | 84941       | -1.924851569 | 0.00000887     |
| Up               | IFI27        | Interferon alpha inducible protein 27                                      | 3429        | -2.936030535 | 0.00000887     |
| Up               | HERC6        | HECT and RLD domain containing E3 ubiquitin protein ligase family member 6 | 55008       | -2.27262453  | 0.00000887     |
| Up               | HEL2Z        | Helicase with zinc finger 2                                                | 85441       | -2.022967637 | 0.00000887     |
| Down             | MTURN        | maturin, neural progenitor differentiation regulator homolog               | 222166      | 0.663532629  | 0.000362109    |
| Down             | EOGT         | EGF domain specific O-linked N-acetylglucosamine transferase               | 285203      | 0.199675192  | 0.001184083    |
| Down             | GXYLT2       | Glucoside xylosyltransferase 2                                             | 727936      | 0.494404491  | 0.001387687    |
| Down             | MYLK         | Myosin light chain kinase                                                  | 4638        | 0.637636967  | 0.001431977    |
| Down             | DHX40        | DEAH-box helicase 40                                                       | 79665       | 0.31391556   | 0.001549972    |
| Down             | RP11-410E4.1 | lincRNA                                                                    | -           | 0.139630264  | 0.001792911    |
| Down             | ACO1         | Aconitase 1                                                                | 48          | 1.139317636  | 0.001839785    |
| Down             | GALNT11      | Polypeptide N-acetylgalactosaminyltransferase 11                           | 63917       | 0.273330797  | 0.002265838    |
| Down             | PDE5A        | Phosphodiesterase 5A                                                       | 8654        | 0.743763137  | 0.00297151     |
| Down             | HS3ST4       | HS3ST4 – heparan sulfate-glucosamine 3-sulfotransferase 4                  | 9951        | 0.225923605  | 0.003275347    |

416

417 **Table 2. Wildtype vs CX4C-Mutant Differentially Expressed Genes**

| Relative to WT | Gene Symbol | Gene Description                                    | NCBI_GeneID | <i>B</i>   | <i>P</i> value | <i>P</i> value (BH) |
|----------------|-------------|-----------------------------------------------------|-------------|------------|----------------|---------------------|
| Down           | NCL         | Nucleolin                                           | 4691        | -0.1118883 | 5.84E-06       | 0.032346124         |
| Down           | AK2         | Adenylate kinase 2                                  | 204         | -0.1604704 | 7.28E-06       | 0.032346124         |
| Down           | TMEM199     | Transmembrane protein 199                           | 147007      | -0.1412261 | 8.51E-06       | 0.032346124         |
| Down           | SNW1        | SNW domain containing 1                             | 22938       | -0.1587004 | 1.13E-05       | 0.035780973         |
| Down           | CDKAL1      | CDK5 regulatory subunit associated protein 1 like 1 | 54901       | -0.2689998 | 1.81E-05       | 0.049244299         |
| Down           | GPKOW       | G-patch domain and KOW motifs                       | 27238       | -0.2037808 | 3.54E-05       | 0.070297745         |
| Down           | TRAFD1      | TRAF-type zinc finger domain containing 1           | 10906       | -0.1964691 | 3.76E-05       | 0.070297745         |
| Down           | PELI3       | Pellino E3 ubiquitin protein ligase family member 3 | 246330      | -0.1745717 | 3.77E-05       | 0.070297745         |
| Down           | CALCOCO2    | Calcium binding and coiled-coil domain 2            | 10241       | -0.2155026 | 4.07E-05       | 0.070297745         |
| Down           | ZMYND8      | Zinc finger MYND-type containing 8                  | 23613       | -0.2766429 | 4.65E-05       | 0.073595815         |
| Up             | C2orf81     | Chromosome 2 open reading frame 81                  | 388963      | 0.34626864 | 7.19E-06       | 0.032346124         |
| Up             | CC2D2A      | Coiled-coil and C2 domain containing 2A             | 57545       | 0.59449472 | 7.39E-06       | 0.032346124         |
| Up             | CFAP221     | Cilia and flagella associated protein 221           | 200373      | 0.77283464 | 6.46E-05       | 0.076430535         |
| Up             | CERKL       | Ceramide kinase like                                | 375298      | 0.52666645 | 7.28E-05       | 0.076780874         |
| Up             | BBOF1       | Basal body orientation factor 1                     | 80127       | 0.48543271 | 0.00016933     | 0.104057284         |
| Up             | PPIL6       | Peptidylprolyl isomerase like 6                     | 285755      | 0.73103569 | 0.0001922      | 0.104057284         |
| Up             | CCDC60      | Coiled-coil domain containing 60                    | 160777      | 0.33676074 | 0.00020953     | 0.104057284         |
| Up             | AKAP14      | A-kinase anchoring protein 14                       | 158798      | 0.78099765 | 0.00021646     | 0.104057284         |
| Up             | PSENE1      | Presenilin enhancer, gamma-secretase subunit        | 55851       | 0.24667032 | 0.00023446     | 0.104057284         |
| Up             | DNAH6       | Dynein axonemal heavy chain 6                       | 1768        | 0.5313297  | 0.00023723     | 0.104057284         |

418

419

420 **Figure 1. Changes in Biological Processes After RSV Infected.** (A) Top ten biological processes, and  
 421 associated genes, significantly enriched in transcripts increased after RSV infection. (B) Top ten  
 422 biological processes, and associated genes, significantly enriched in transcript decreased after RSV  
 423 infection. Colors represent the biological processes distinguished in the legend.

424

425 **Figure 2. Changes in Biological Processes between wild-type and mutant RSV Infection.** (A) Top ten  
426 biological processes, and associated genes, significantly enriched in transcripts increased after wild-type  
427 RSV infection compared to mutant (CX4C) infection. (B) Top ten biological processes, and associated  
428 genes, significantly enriched in transcript decreased after wild-type RSV infection compared to mutant  
429 (CX4C) infection. Colors represent the biological processes distinguished in the legend.

430

431 **Figure 3. Effect of G-protein on Epithelial Cell Transcripts.** Transcript levels of expression after  
432 treatment of epithelial cell cultures with recombinant G-protein for (A) CC2D2A, (B) CFAP331, (C) and  
433 Nucleolin.

434

435 **Figure 4. Ciliated Cells after RSV Infection.** Quantification of the number of ciliated cells staining  
436 positive for acetylated tubulin per nucleus (dapi) in mock or RSV infected cultures.

437

Mock  $\updownarrow$  Infection

Mock  $\updownarrow$  Infection

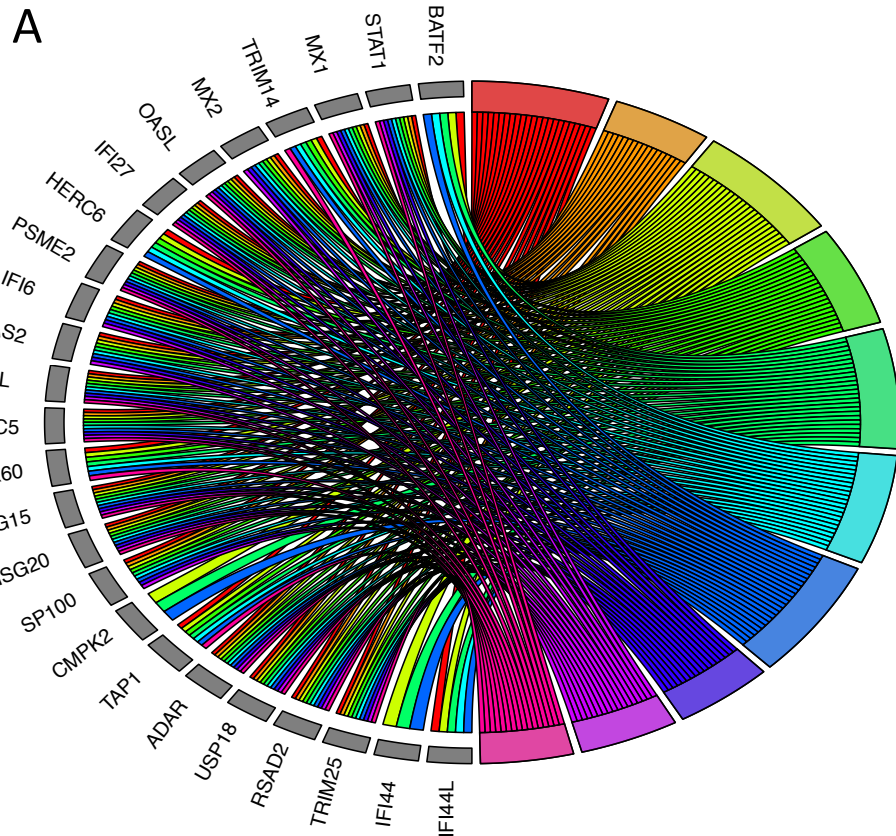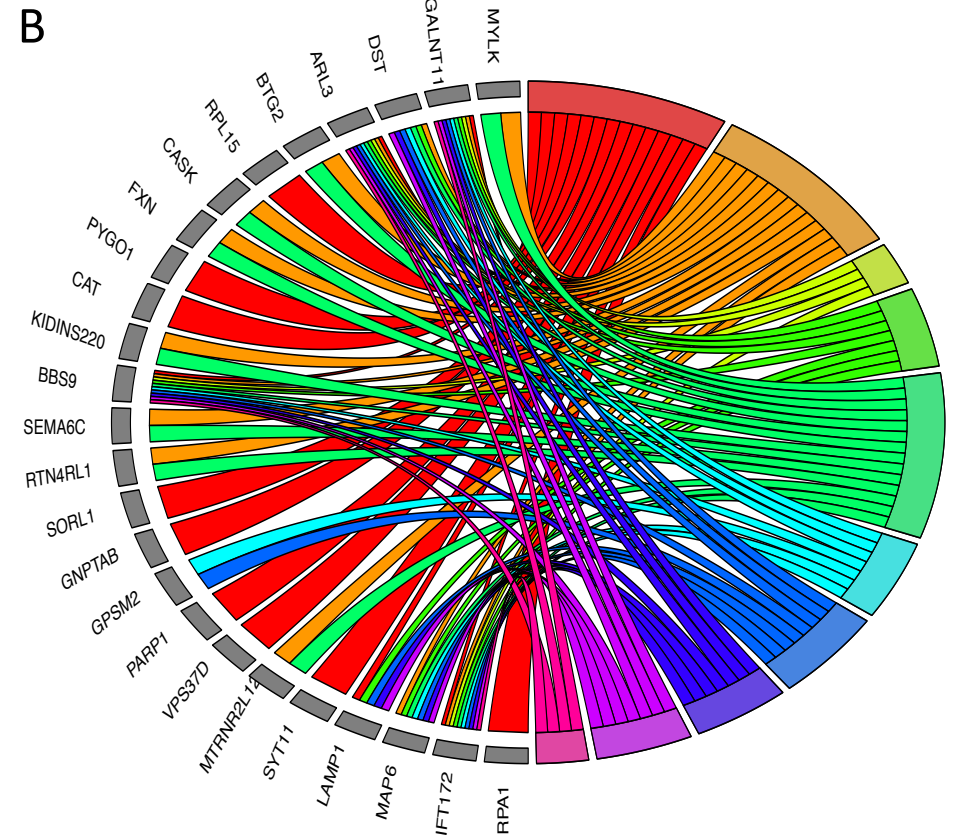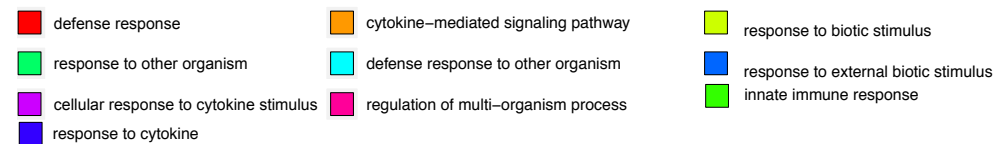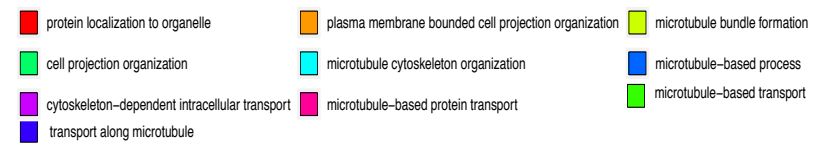

Figure 1

WT ↑ ↓ MUT

WT ↓ ↑ MUT

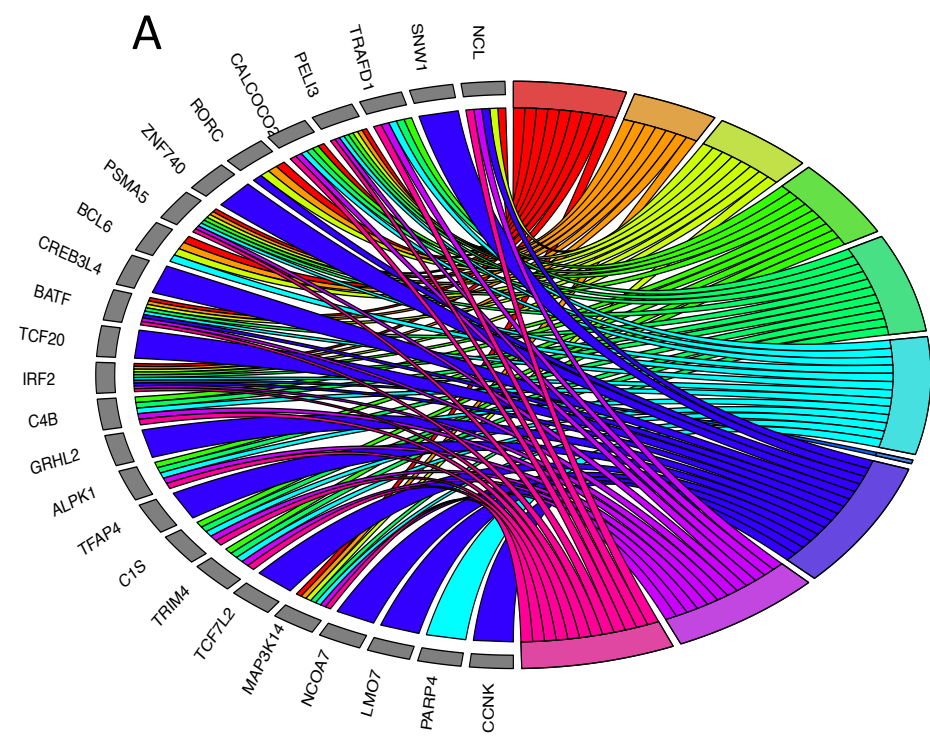

- response to cytokine
- cytokine-mediated signaling pathway
- cellular response to cytokine stimulus
- innate immune response
- defense response to other organism
- defense response
- response to type I interferon
- positive regulation of RNA metabolic process
- response to biotic stimulus
- response to other organism

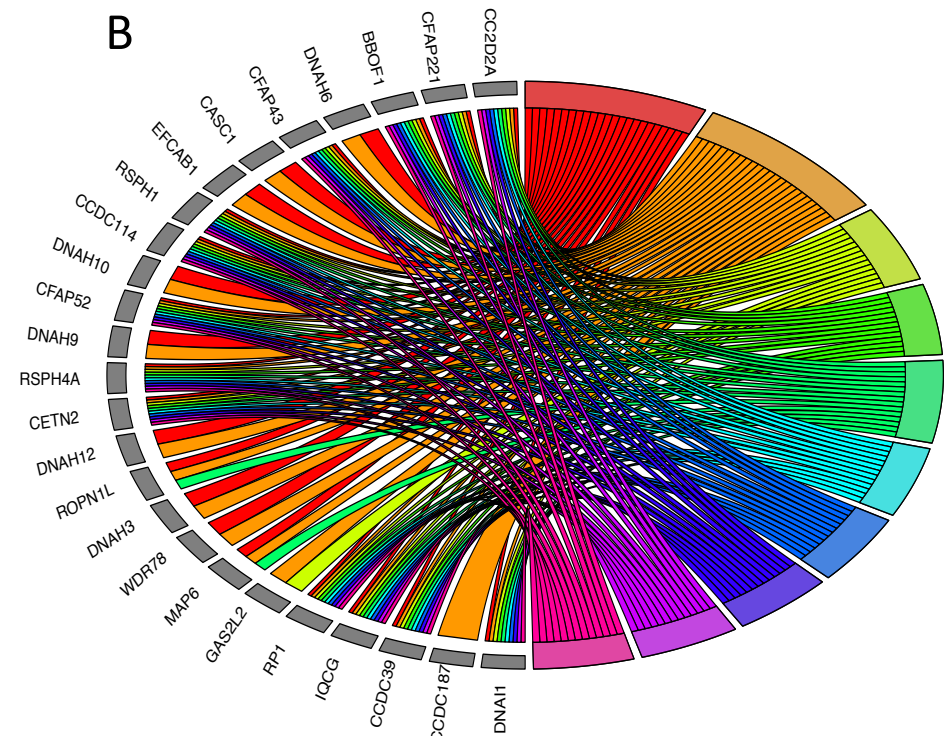

- microtubule-based movement
- microtubule-based process
- microtubule bundle formation
- cilium organization
- microtubule-based transport
- microtubule-based protein transport
- protein transport along microtubule
- intraciliary transport
- ciliary transition zone assembly
- intraciliary transport involved in cilium assembly

Figure 2

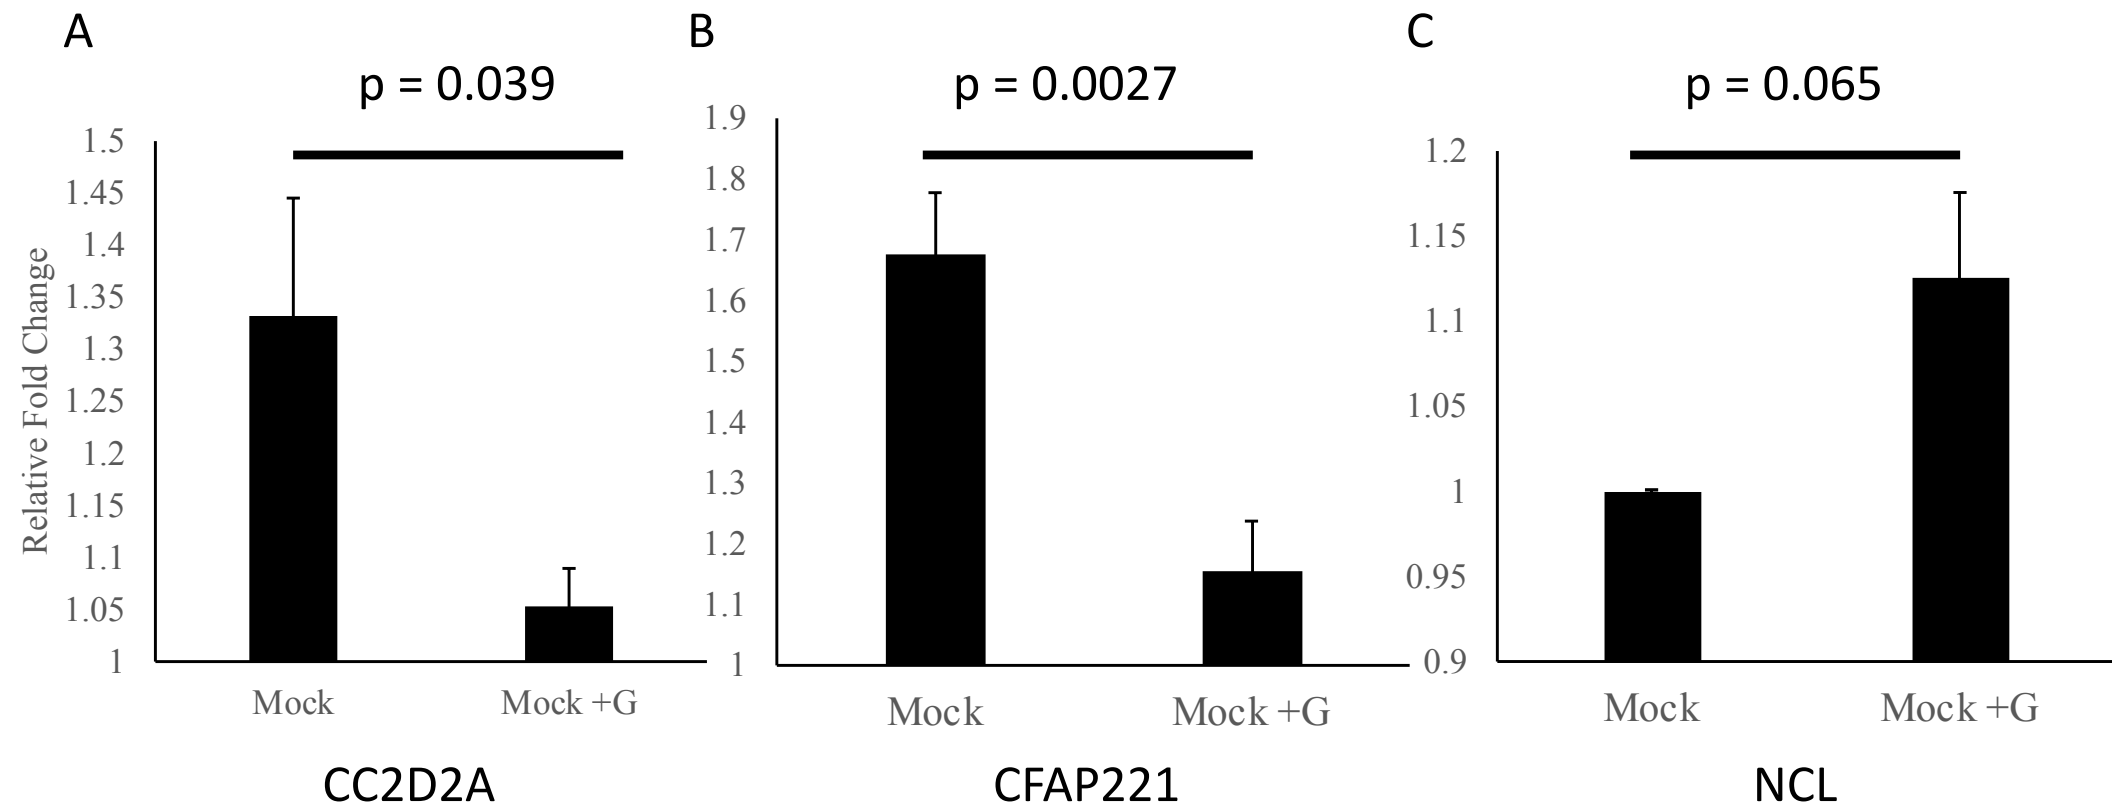

Figure 3

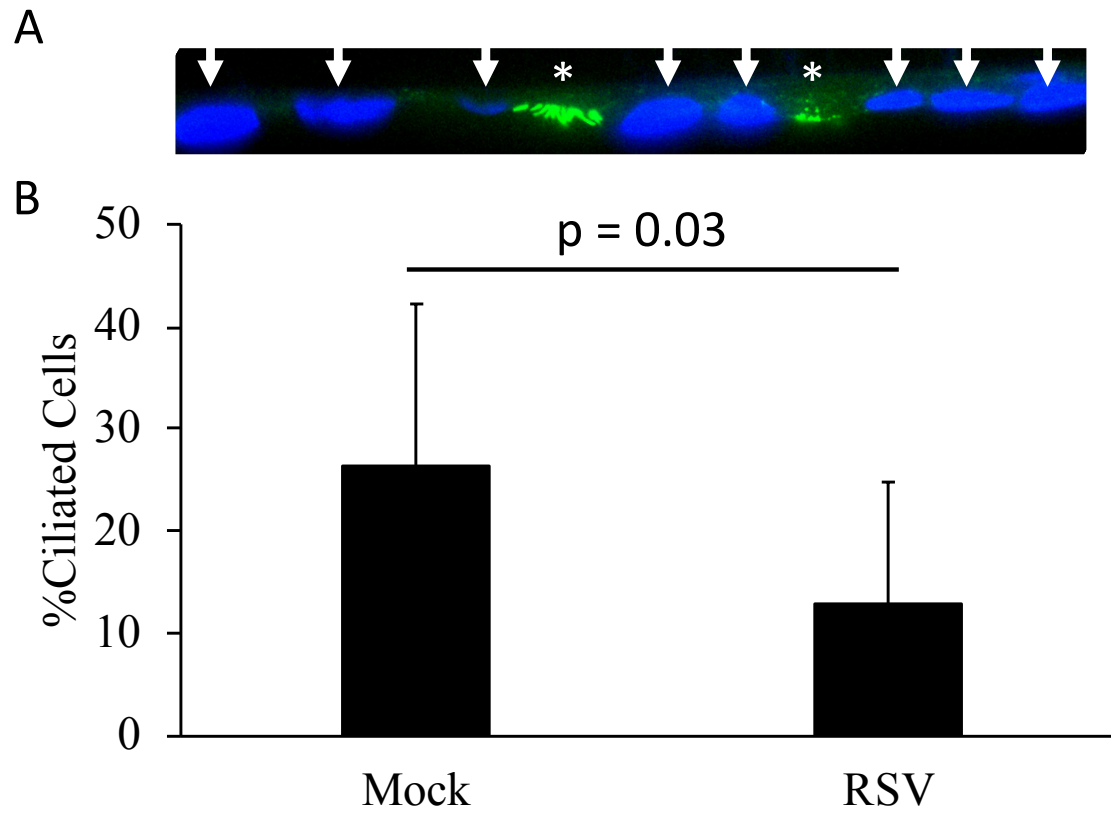

Figure 4
